# Supplementary material for: Saccharomyces cerevisiae Rev7 promotes non-homologous end-joining by blocking Mre11 nuclease and Rad50’s ATPase activities and homologous recombination
Source: eLife. 2024 Dec 4;13:RP96933. doi: 10.7554/eLife.96933 (PMC11616998; doi:10.7554/eLife.96933)
Supplement: Figure 1—figure supplement 3—source data 1. [file elife-96933-fig1-figsupp3-data1.xlsx]

## Sheet: Sheet1
Rev7-GFP	Replicate 1	Replicate 2	Replicate 3		Rev7-GFP	Replicate 1	Replicate 2	Replicate 3		Rev7-GFP	Replicate 1	Replicate 2	Replicate 3		Rev7-GFP	Replicate 1	Replicate 2	Replicate 3
Mre11 (M)	Fraction bound (a.u.)	Fraction bound (a.u.)	Fraction bound (a.u.)		Rad50 (M)	Fraction bound (a.u.)	Fraction bound (a.u.)	Fraction bound (a.u.)		Xrs2 (M)	Fraction bound (a.u.)	Fraction bound (a.u.)	Fraction bound (a.u.)		Mre11/Rad50 (M)	Fraction bound (a.u.)	Fraction bound (a.u.)	Fraction bound (a.u.)
1.53e-10	0.00233446	outlier	0.126127		6.1e-11	-0.061582	0.16894	outlier		1.53e-10	-0.0370036	0.0616556	-0.126874		1.53e-10	-0.0711363	0.26875	0.664766
3.05e-10	-0.0835422	-0.249171	outlier		1.22e-10	0.224544	-0.0718742	-0.0394881		6.1e-10	0.0842837	0.19829	-0.159878		3.05e-10	0.00292848	0.186429	outlier
6.1e-10	-0.0487847	-0.0739589	outlier		2.44e-10	0.225878	0.0970045	0.185849		1.22e-09	0.169097	0.218015	-0.146468		6.1e-10	-0.308983	-0.0272101	0.223897
1.22e-09	0.27816	0.0623857	0.149015		4.88e-10	-0.0278087	0.0532441	-0.00777018		2.44e-09	-0.0108518	-0.0680822	-0.0992065		1.22e-09	-0.218827	0.42273	-0.338202
2.44e-09	0.044254	0.157183	0.226361		9.77e-10	-0.176135	0.0789899	0.048941		4.88e-09	0.252654	0.19484	0.0072341		2.44e-09	0.15248	-0.179321	outlier
4.88e-09	-0.0491865	0.0156072	-0.128215		1.95e-09	-0.181952	-0.191001	-0.134233		9.77e-09	0.0011183	-0.353519	0.110485		4.88e-09	-0.0334092	-0.0843521	0.0370444
9.77e-09	-0.143291	-0.000174626	-0.108654		3.91e-09	-0.0120409	-0.0274522	0.0617556		1.95e-08	-0.0613428	-0.0845428	0.211813		9.77e-09	outlier	0.013704	-0.168333
1.95e-08	outlier	0.0835385	-0.234326		7.81e-09	0.0692763	-0.0380948	0.164228		3.91e-08	0.263821	0.165277	0.137282		1.95e-08	0.431951	outlier	0.221444
3.91e-08	0.125523	-0.00720134	0.0840712		1.56e-08	-0.0496257	-0.0381289	0.154305		1.56e-07	0.286779	0.0663869	outlier		3.91e-08	0.362385	-0.00654249	0.0408921
7.81e-08	0.312128	0.18017	-0.114361		3.13e-08	0.442577	0.0696035	-0.0964758		3.13e-07	0.503713	0.207802	0.499075		1.56e-07	0.587109	0.233262	0.466065
3.13e-07	0.589086	0.684074	0.60221		6.25e-08	0.102203	0.0366008	outlier		6.25e-07	0.42623	0.252364	0.303581		6.25e-07	outlier	1.02787	1.13326
6.25e-07	0.948411	0.982003	1.22447		1.25e-07	0.624464	0.389051	0.347338		1.25e-06	0.785607	0.810181	outlier		1.25e-06	outlier	0.812975	0.979912
1.25e-06	0.842777	0.889275	0.797907		5e-07	0.799139	0.616502	0.673322		2.5e-06	0.870556	1.01881	0.782798		2.5e-06	1.08466	0.987253	0.979912
2.5e-06	0.998781	0.93087	1.01411		1e-06	0.985519	0.972993	0.914796		5e-06	0.773737	0.922379	0.954689		5e-06	0.900129	0.994724	1.11293
5e-06	1.23951	1.08587	1.18533		2e-06	0.959649	0.914378	0.842535
Rev7-GFP	Replicate 1	Replicate 2	Replicate 3
Rev1 (M)	Fraction bound (a.u.)	Fraction bound (a.u.)	Fraction bound (a.u.)		GFP	Replicate 1	Replicate 2	GFP	Replicate 1	Replicate 2	GFP	Replicate 1	Replicate 2	Rev7-GFP	Replicate 1	Replicate 2
1.53e-10	0.0222791	-0.0632015	0.0058882		Rad50 (M)	Fnorm	Fnorm	Mre11 (M)	Fnorm	Fnorm	Xrs2 (M)	Fnorm	Fnorm	Sae2 (M)	Fnorm	Fnorm
3.05e-10	-0.0127306	-0.0588165	-0.154323		1e-06	924.592	925.06	5e-06	919.067	921.133	5e-06	917.814	920.098	2.5e-06	917.295	920.052
6.1e-10	outlier	-0.0430235	0.0426145		5e-07	921.819	922.517	2.5e-06	920.552	921.737	2.5e-06	917.619	919.346	1e-06	922.582	920.691
1.22e-09	-0.0157744	0.0660153	-0.11532		2.5e-07	923.591	923.129	1.25e-07	917.642	922.269	1e-06	918.896	920.841	5e-07	917.72	921.237
2.44e-09	0.0951811	0.014628	outlier		1.25e-07	922.156	922.546	6.25e-08	918.125	921.051	5e-07	922.101	919.294	2.5e-07	917.687	920.69
4.88e-09	0.070761	0.01769	0.124047		6.25e-08	922.099	922.878	3.13e-08	919.046	925.449	2.5e-07	918.73	919.906	1.25e-07	918.3	919.957
9.77e-09	0.104125	0.174556	-0.0320162		3.13e-08	921.554	922.701	1.56e-08	918.075	921.279	1.25e-07	919.974	919.64	6.25e-08	917.279	919.889
1.95e-08	0.0136289	0.129637	0.319826		1.56e-08	922.858	922.863	7.81e-09	918.952	921.6	6.25e-08	919.133	919.497	3.13e-08	919.958	921.74
3.91e-08	0.0893361	-0.0116958	0.405292		7.81e-09	920.918	921.904	3.91e-09	920.857	922.537	3.13e-08	921.163	919.18	1.56e-08	919.499	920.256
7.81e-08	0.124463	0.154431	0.454589		3.91e-09	923.543	924.367	1.95e-09	918.861	920.694	1.56e-08	919.495	919.817	7.81e-09	918.461	920.094
1.56e-07	0.125878	0.24996	outlier		1.95e-09	922.639	923.239	9.77e-10	920.385	922.999	7.81e-09	919.67	921.634	3.91e-09	920.223	922.592
3.13e-07	0.332227	0.285754	outlier		9.77e-10	921.244	922.333	4.88e-10	921.018	921.056	3.91e-09	920.952	921.295	1.95e-09	919.513	921.066
6.25e-07	0.704589	0.710321	0.724356		4.88e-10	924.249	924.614	2.44e-10	919.196	921.603	1.95e-09	920.194	921.211	9.77e-10	919.811	920.904
1.25e-06	0.989555	1.11905	0.85987		2.44e-10	922.089	922.493	1.53e-10	921.148	923.875	9.77e-10	919.891	922.218	4.88e-10	924.573	920.828
2.5e-06	1.24082	outlier	1.11989		1.22e-10	922.178	922.637	1.22e-10	920.301	922.297	4.88e-10	919.477	921.384	2.44e-10	920.508	920.597
5e-06	1.19044	1.11635	1.06409		6.1e-11	922.25	922.756	6.1e-11	920.563	922.602	2.44e-10	920.435	922.44	1.22e-10	919.716	921.327
					3.05e-11	922.624	923.111	3.05e-11	920.598	922.424	1.22e-10	920.026	920.904	6.1e-11	920.167	921.566
