# Supplementary material for: Saccharomyces cerevisiae Rev7 promotes non-homologous end-joining by blocking Mre11 nuclease and Rad50’s ATPase activities and homologous recombination
Source: eLife. 2024 Dec 4;13:RP96933. doi: 10.7554/eLife.96933 (PMC11616998; doi:10.7554/eLife.96933)
Supplement: Figure 1—figure supplement 4—source data 1. [file elife-96933-fig1-figsupp4-data1.xlsx]

## Sheet: Sheet1
Rev7-C1	Replicate 1	Replicate 2	Replicate 3
Mre11 (M)	Fraction bound (a.u.)	Fraction bound (a.u.)	Fraction bound (a.u.)
1.53e-10	-0.0163266	0.127925	-0.0991748
3.05e-10	-0.11435	-0.00604993	-0.0300394
6.1e-10	-0.0343913	0.0474215	-0.0215248
1.22e-09	0.00714882	0.167982	0.272178
2.44e-09	0.0948459	outlier	-0.379948
4.88e-09	-0.0203716	0.164019	0.0924157
9.77e-09	0.0793056	-0.0619248	0.0505128
1.95e-08	0.0167037	0.0928494	0.0916434
3.91e-08	0.047643	-0.173608	-0.0797487
7.81e-08	-0.0149256	-0.128695	0.2826
1.56e-07	0.132254	-0.025771	0.144773
3.13e-07	0.213995	0.193577	outlier
6.25e-07	0.495555	outlier	0.32797
1.25e-06	0.800744	0.800744	outlier
2.5e-06	0.816431	outlier	0.774045
5e-06	0.992759	0.783025	0.843562
Rev7-C1	Replicate 1	Replicate 2	Replicate 3
Rad50 (M)	Fraction bound (a.u.)	Fraction bound (a.u.)	Fraction bound (a.u.)
6.1e-11	-0.133085	0.0549123	outlier
1.22e-10	-0.22941	-0.10441	-0.364985
2.44e-10	-0.0897196	0.235671	-0.30709
4.88e-10	0.0245669	outlier	0.057924
9.77e-10	-0.00108581	outlier	0.0824414
1.95e-09	-0.0116755	-0.025298	-0.0160532
3.91e-09	0.103055	0.254293	0.0641724
7.81e-09	0.103058	-5.47269e-05	0.172923
3.13e-08	0.223521	outlier	0.130803
6.25e-08	0.16841	-0.380501	0.164143
1.25e-07	-0.00843271	0.137301	0.053179
2.5e-07	outlier	0.00811014	0.0924735
5e-07	0.0104962	0.526644	0.199586
1e-06	0.39044	0.584655	0.591636
2e-06	0.416119	0.6368	0.606195
Rev7-C1	Replicate 1	Replicate 2	Replicate 3
Mre11/Rad50 (M)	Fraction bound (a.u.)	Fraction bound (a.u.)	Fraction bound (a.u.)
1.53e-10	-0.0165314	-0.00424878	-0.00793441
3.05e-10	0.0627785	0.00515102	-0.0356767
6.1e-10	-0.00150648	0.0450607	-0.000989794
1.22e-09	-0.0457741	-0.0325078	-0.0591453
2.44e-09	0.03427	0.0132564	outlier
4.88e-09	0.00835383	-0.0870364	0.00514934
9.77e-09	0.0210497	0.00584646	0.0305489
1.95e-08	-0.0554806	0.0175409	0.0172792
3.91e-08	0.0363562	0.0176253	0.0603799
7.81e-08	0.0672159	0.0556982	0.143087
1.56e-07	0.0590207	0.161139	outlier
3.13e-07	0.252567	0.204101	0.298217
6.25e-07	0.260277	0.37387	0.452388
1.25e-06	0.515523	0.411612	0.537735
2.5e-06	0.645783	0.641074	outlier
5e-06	0.806168	0.834622	0.901385
