# Supplementary material for: Saccharomyces cerevisiae Rev7 promotes non-homologous end-joining by blocking Mre11 nuclease and Rad50’s ATPase activities and homologous recombination
Source: eLife. 2024 Dec 4;13:RP96933. doi: 10.7554/eLife.96933 (PMC11616998; doi:10.7554/eLife.96933)
Supplement: Supplementary file 4. — The p-values were obtained by comparing the percentage of non-homologous end-joining observed for the indicated single- or double-gene deletions versus either the wild-type (WT) or rev7Δ strain, using non-parametric one-way ANOVA Dunnett test. [file elife-96933-supp4.docx]

| Reference strain | Strain | p-values |
| --- | --- | --- |
| **WT** | *rev7* | <0.0001 |
|  | *mre11* | <0.0001 |
|  | *ku70* | <0.0001 |
|  | *rev1* | 0.0046 |
|  | *rev3* | 0.0009 |
|  | *rev7-C1* | <0.0001 |
|  | *rev7-42* | 0.369 |
| ***rev7*** | *rev7-C1* | 0.3664 |
|  | *rev7-42* | 0.0002 |
