# Supplementary figures and images for: Saccharomyces cerevisiae Rev7 promotes non-homologous end-joining by blocking Mre11 nuclease and Rad50’s ATPase activities and homologous recombination
Source: eLife journal article supplement (doi:10.7554/elife.96933), 2024-04-19

(A)

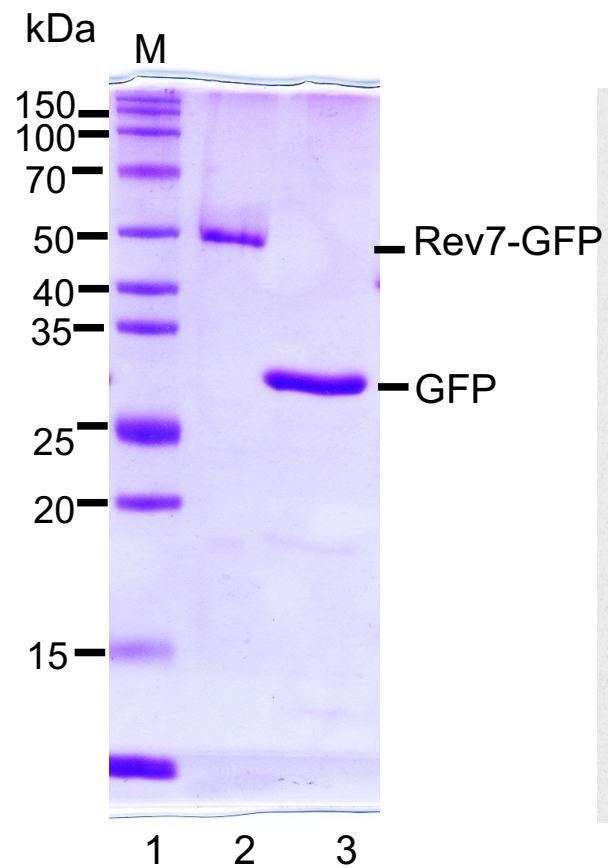

(B)

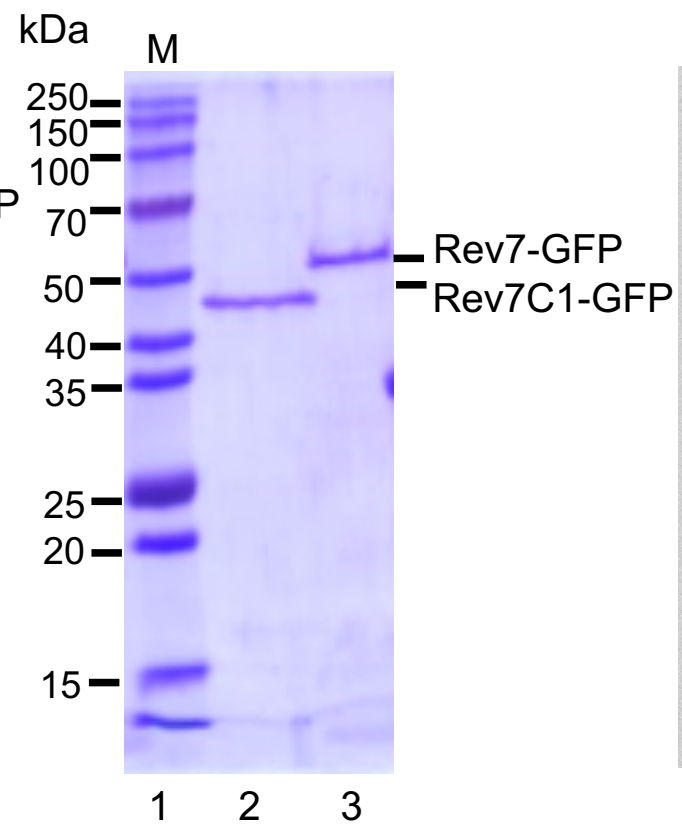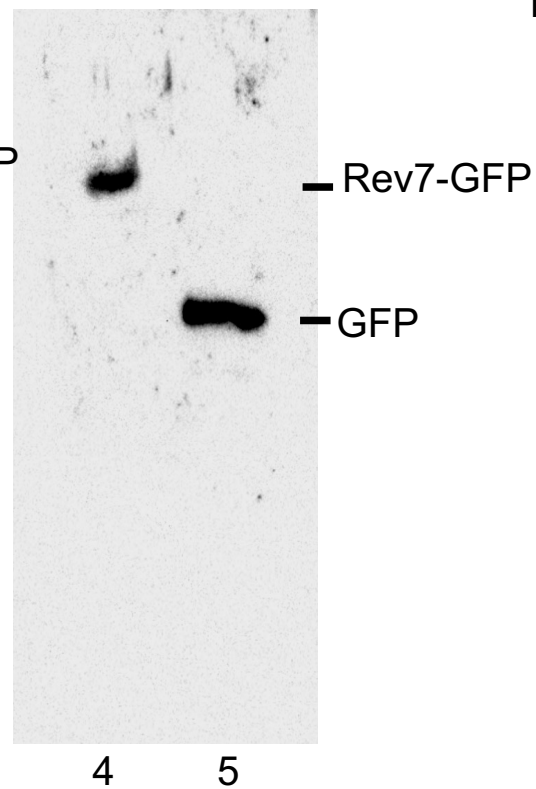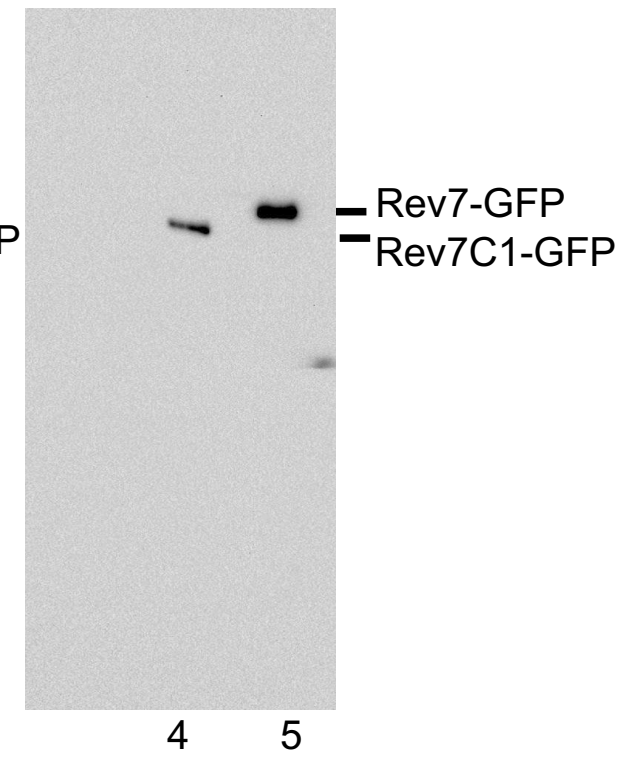

(C)

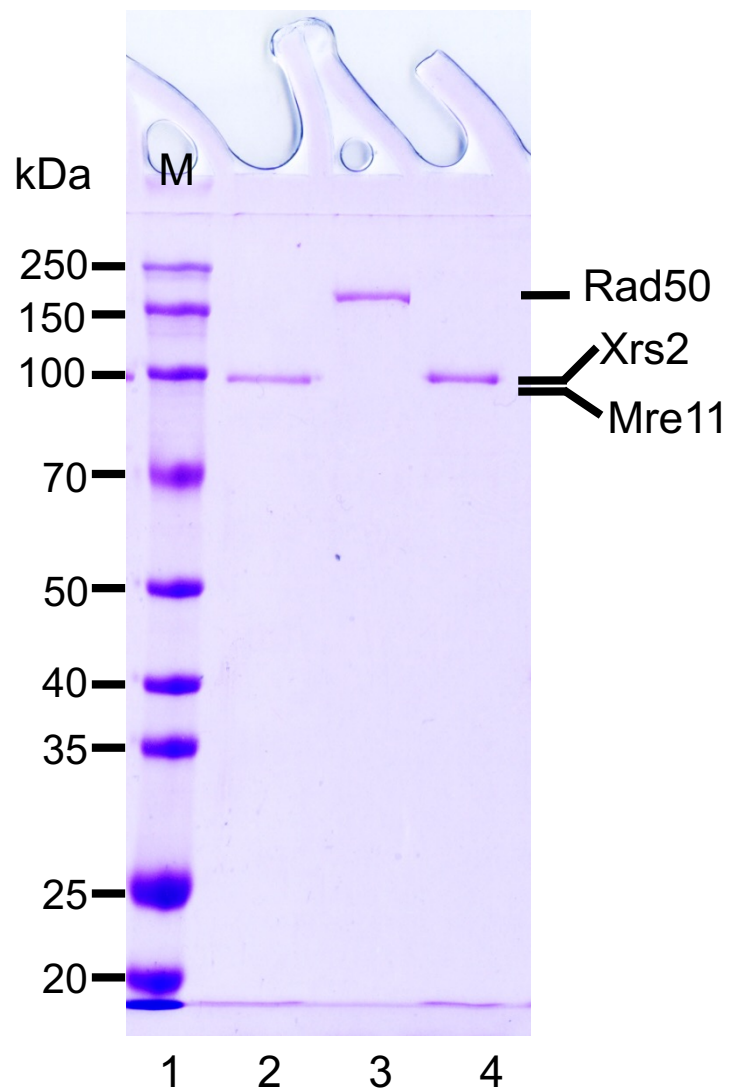

(D)

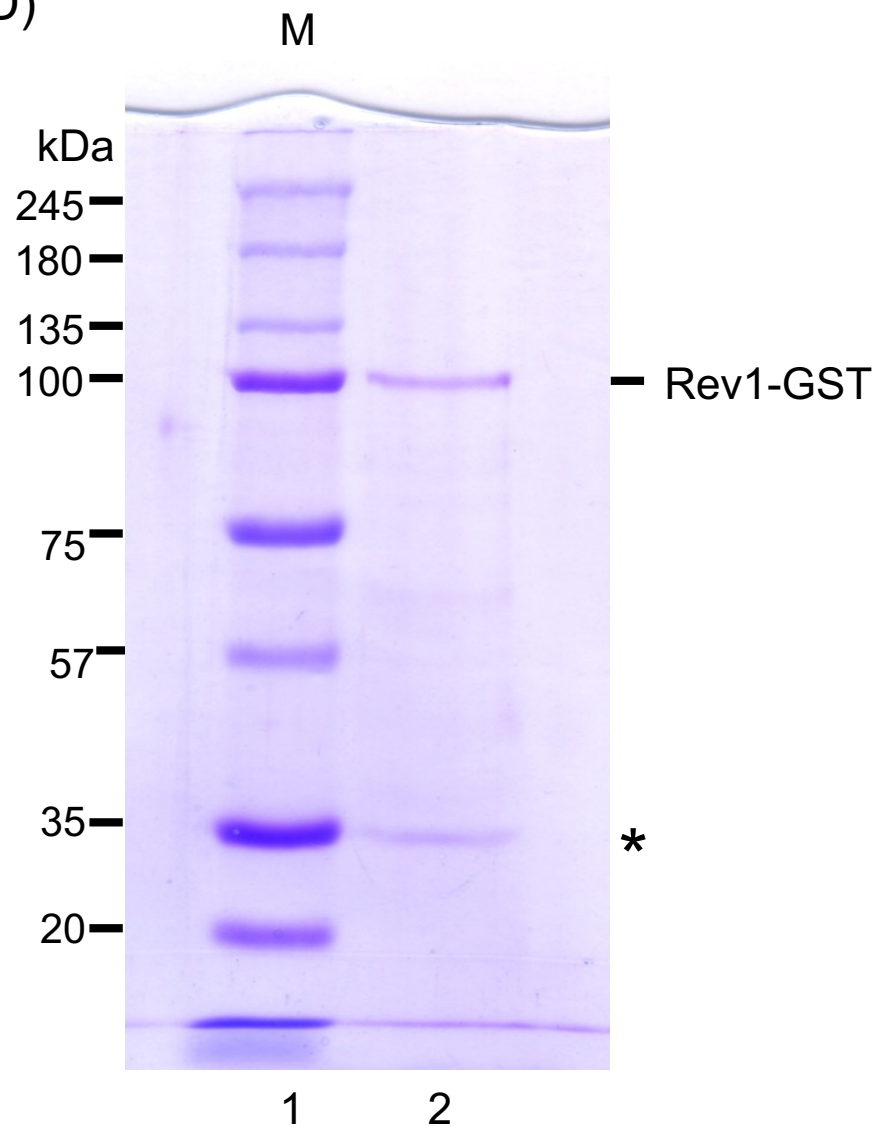

(E)

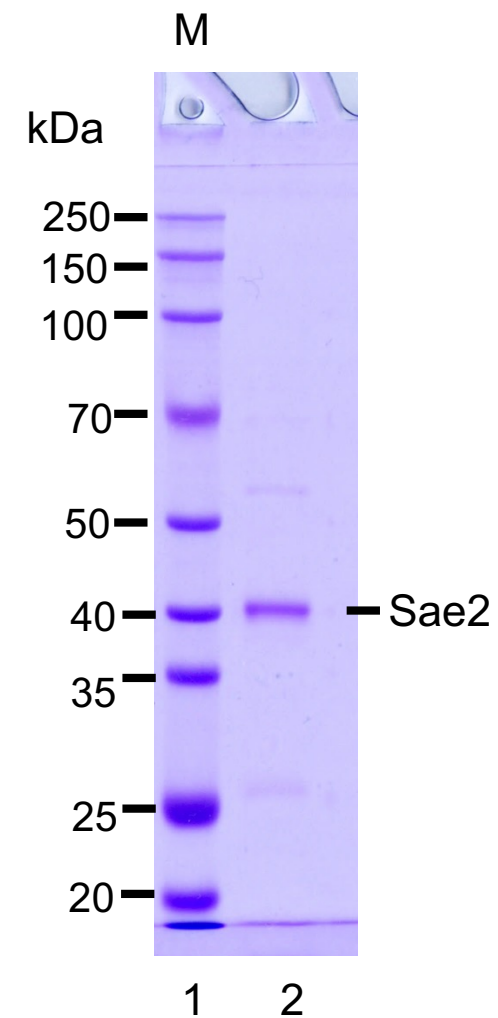

(F)

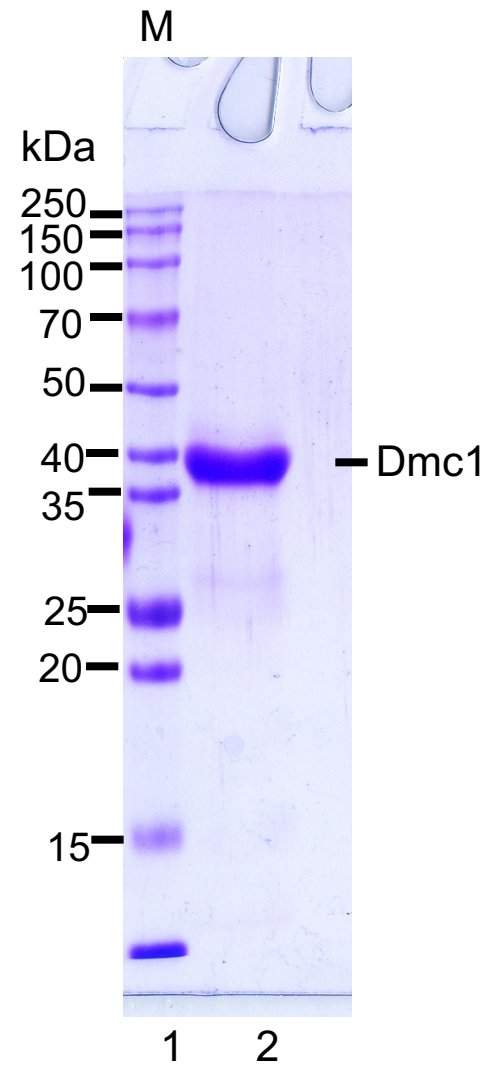

Supplement: fig1-figsupp1-data2 [file elife-96933-fig1-figsupp1-data2-v1.zip]

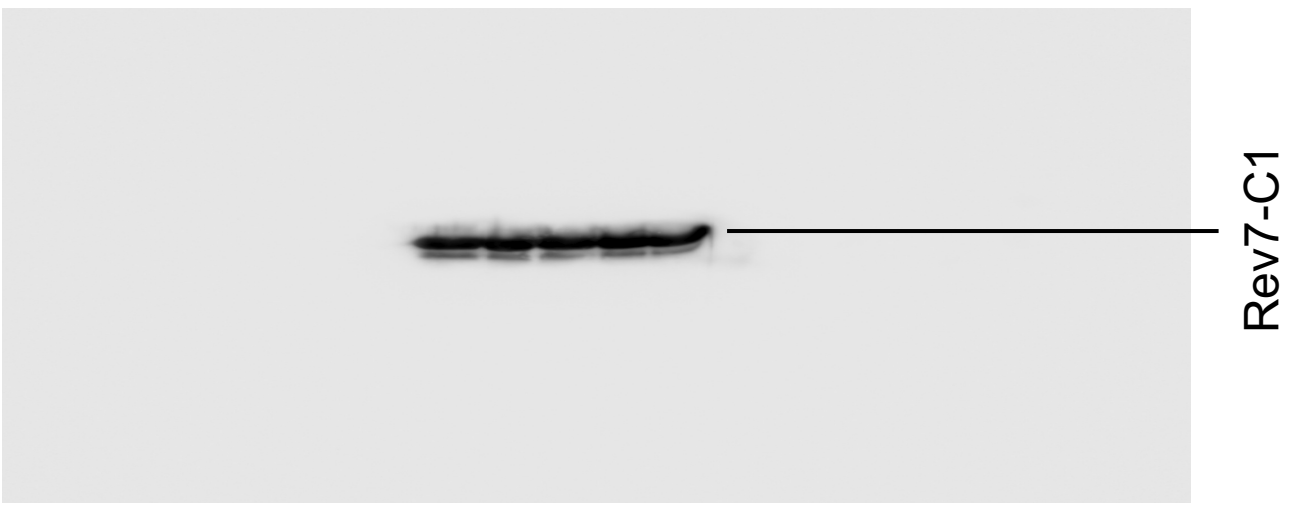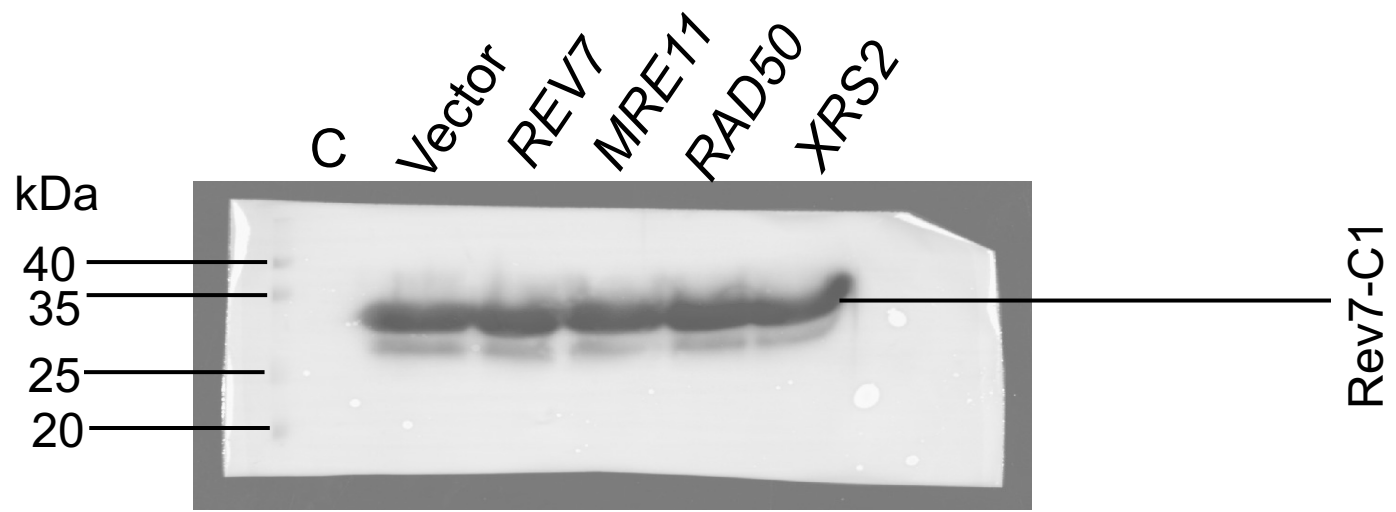

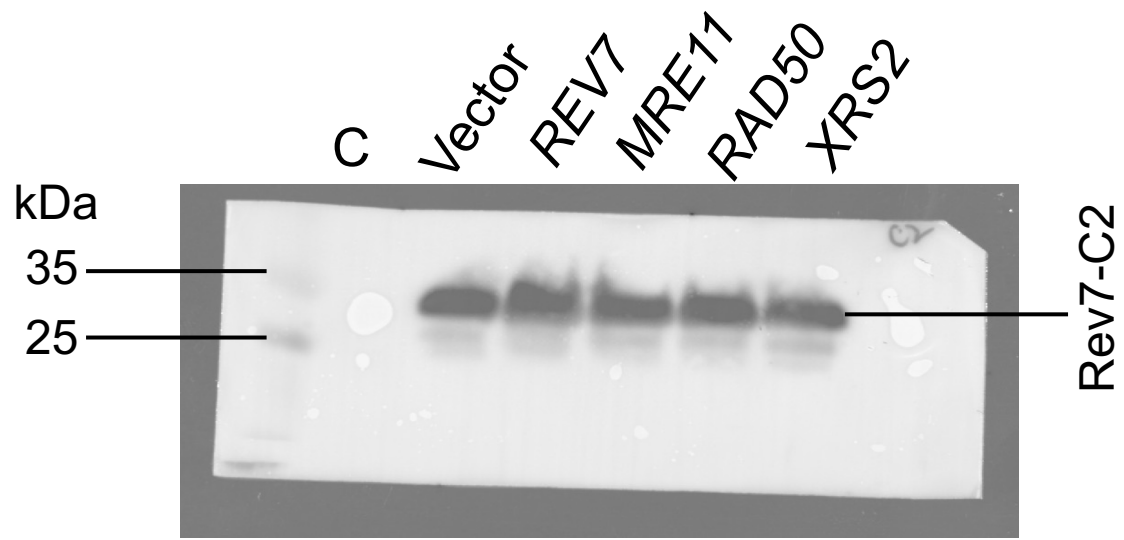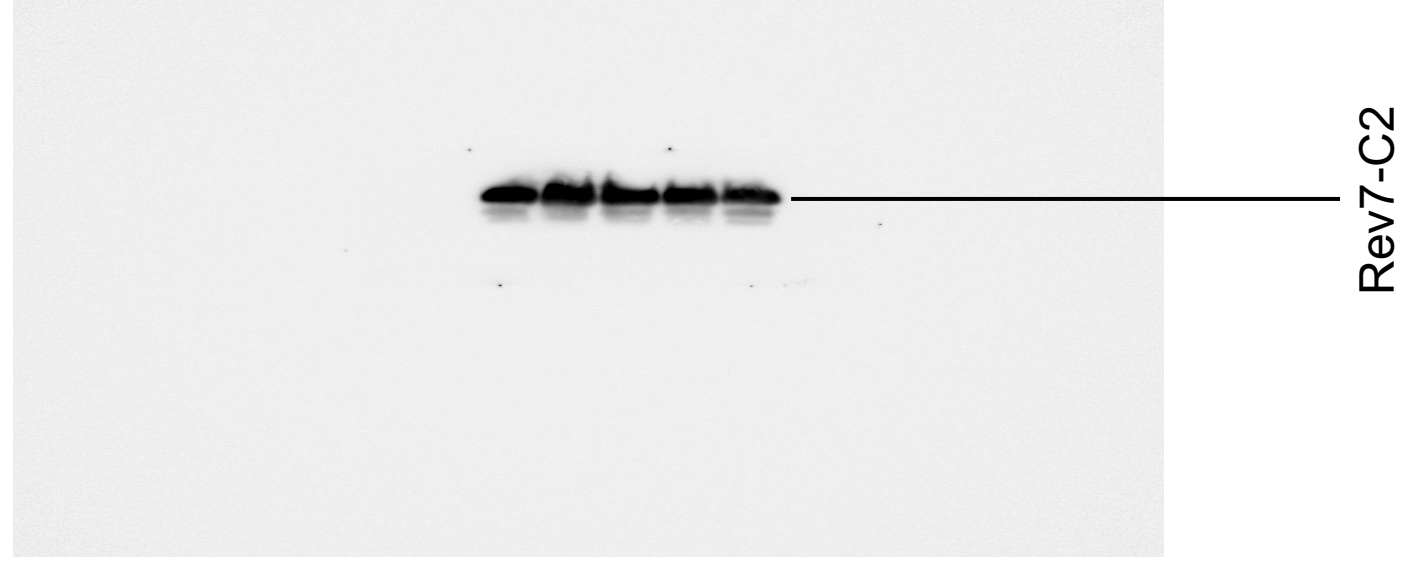

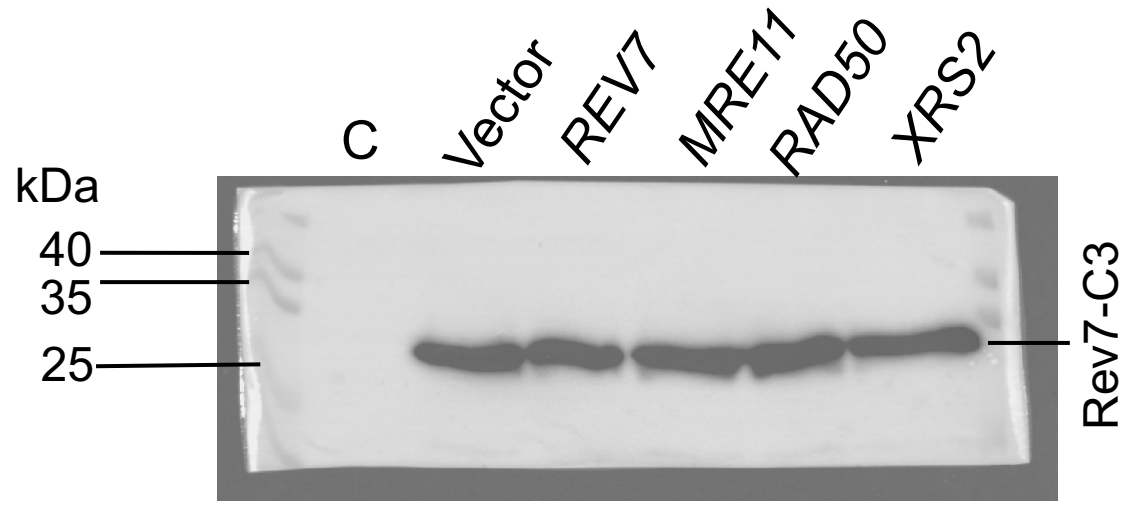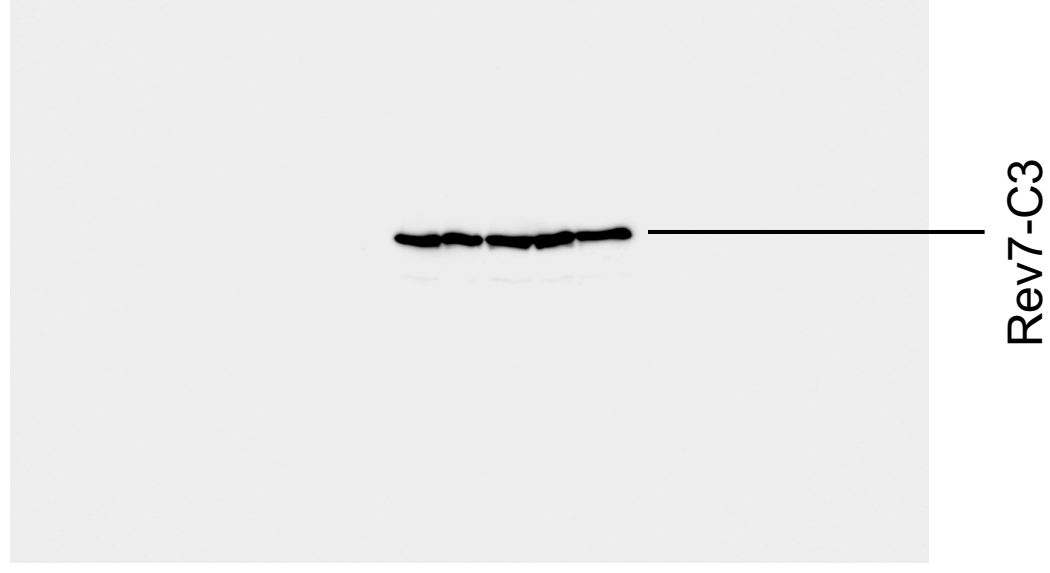

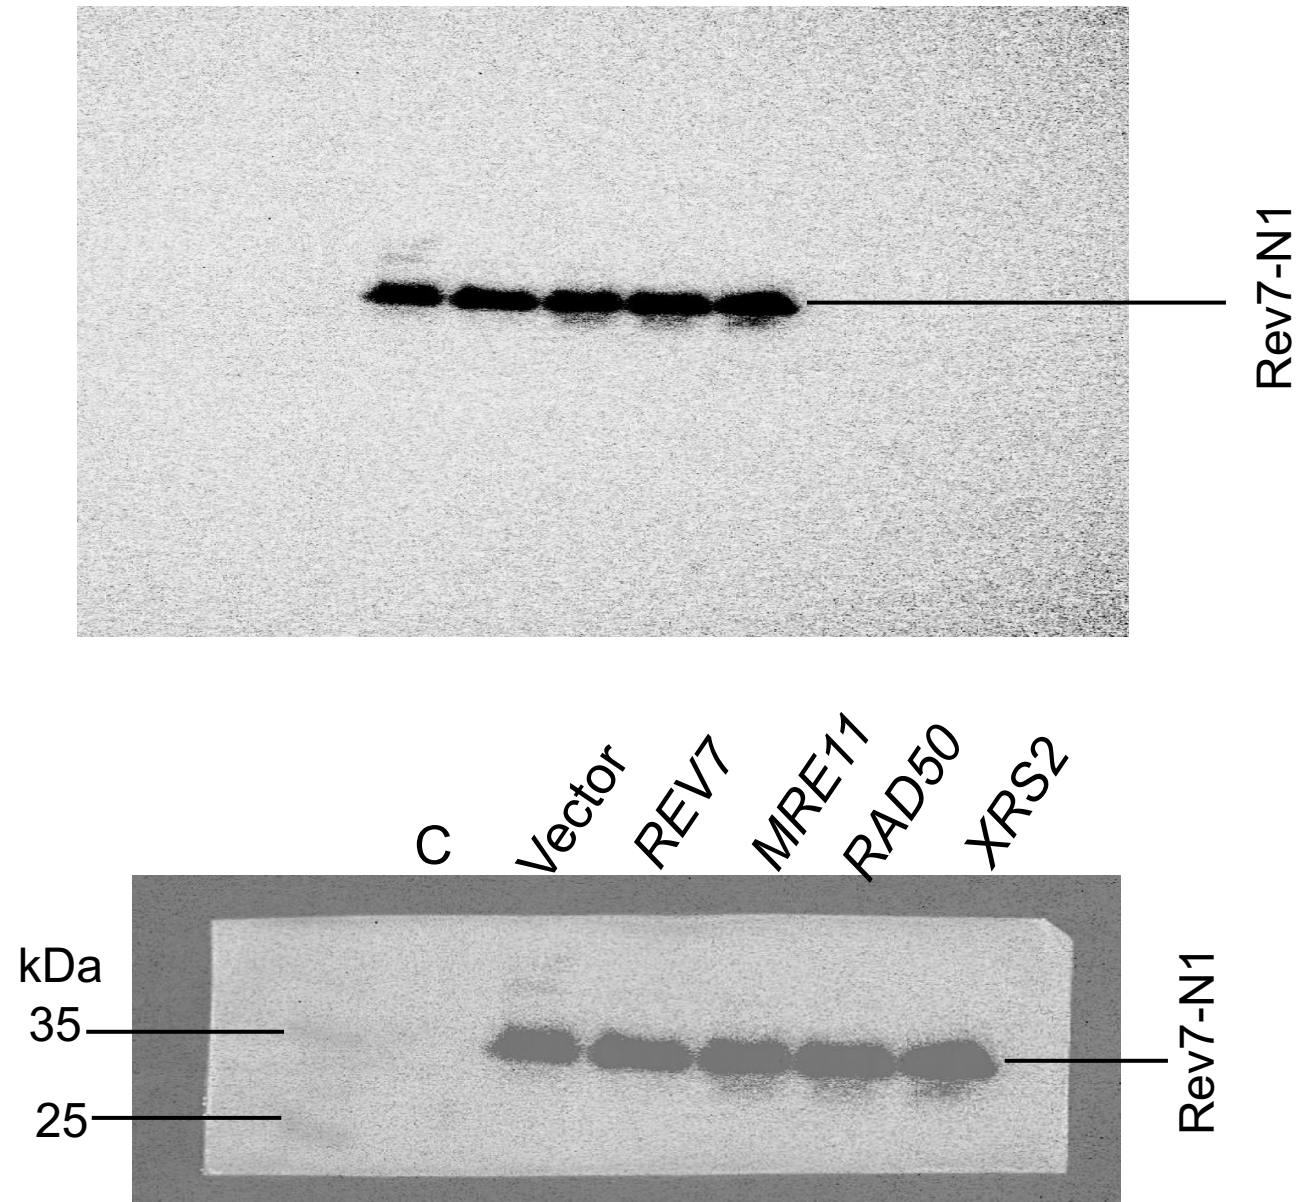

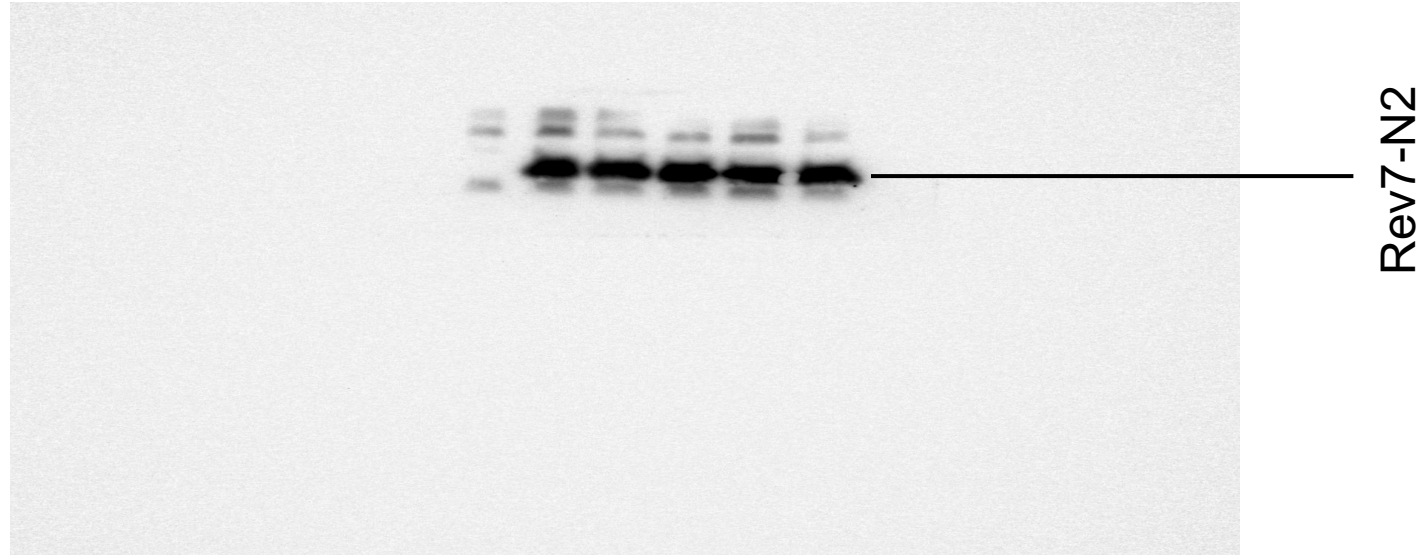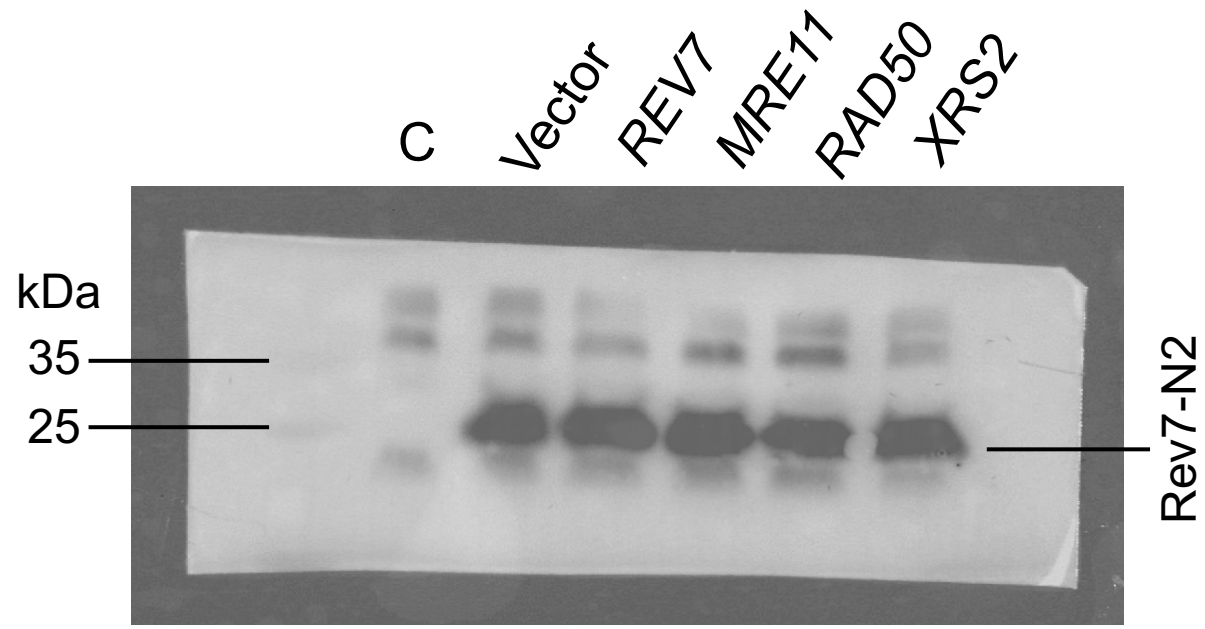

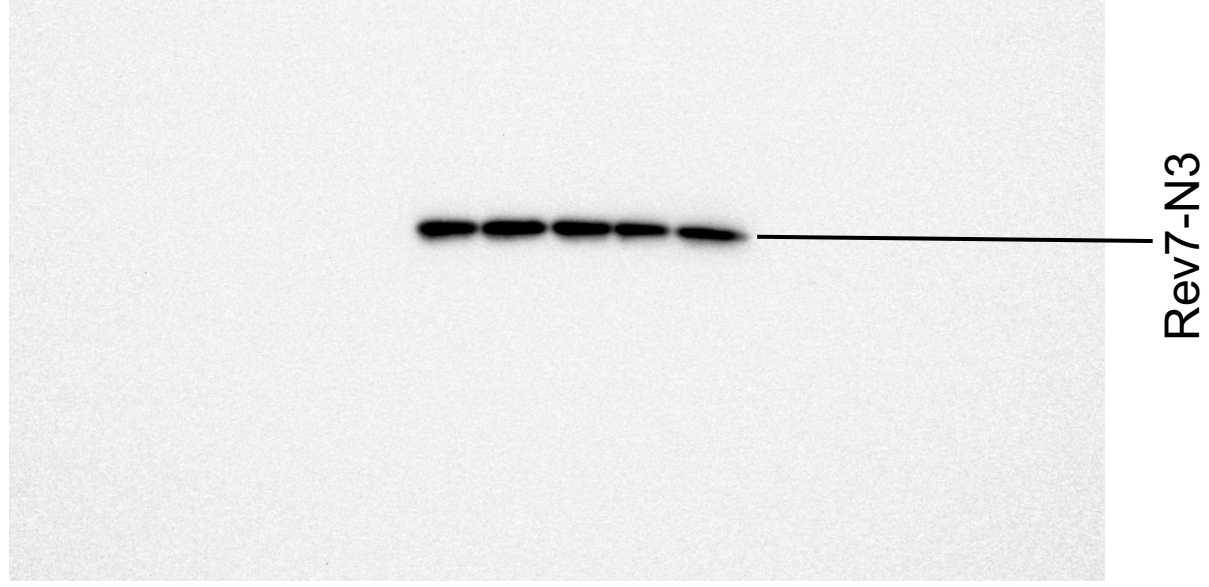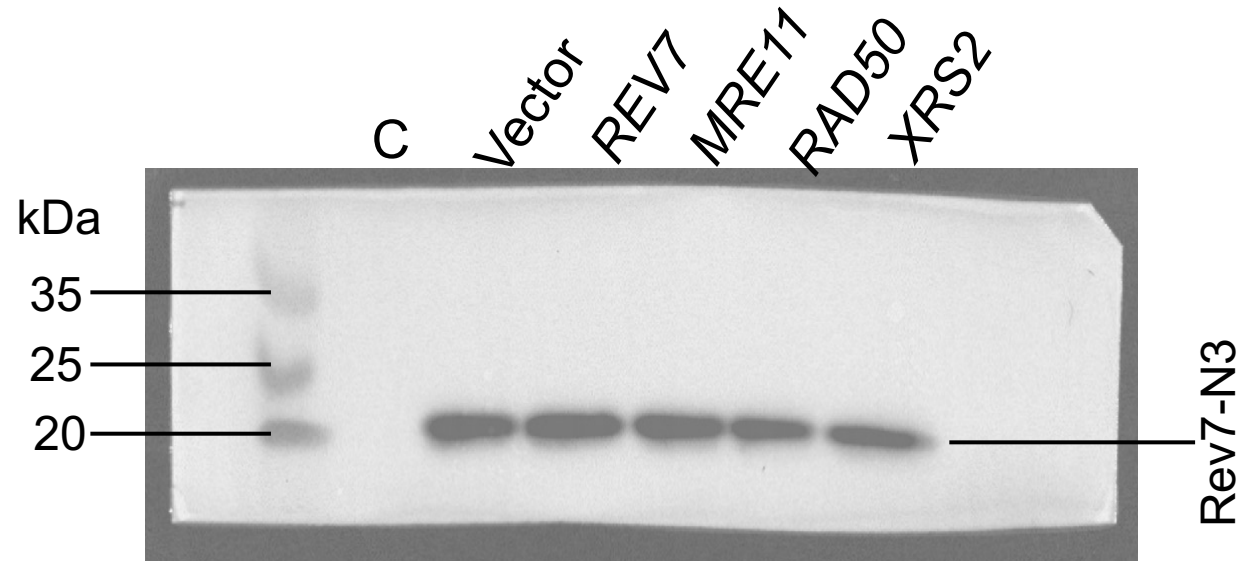

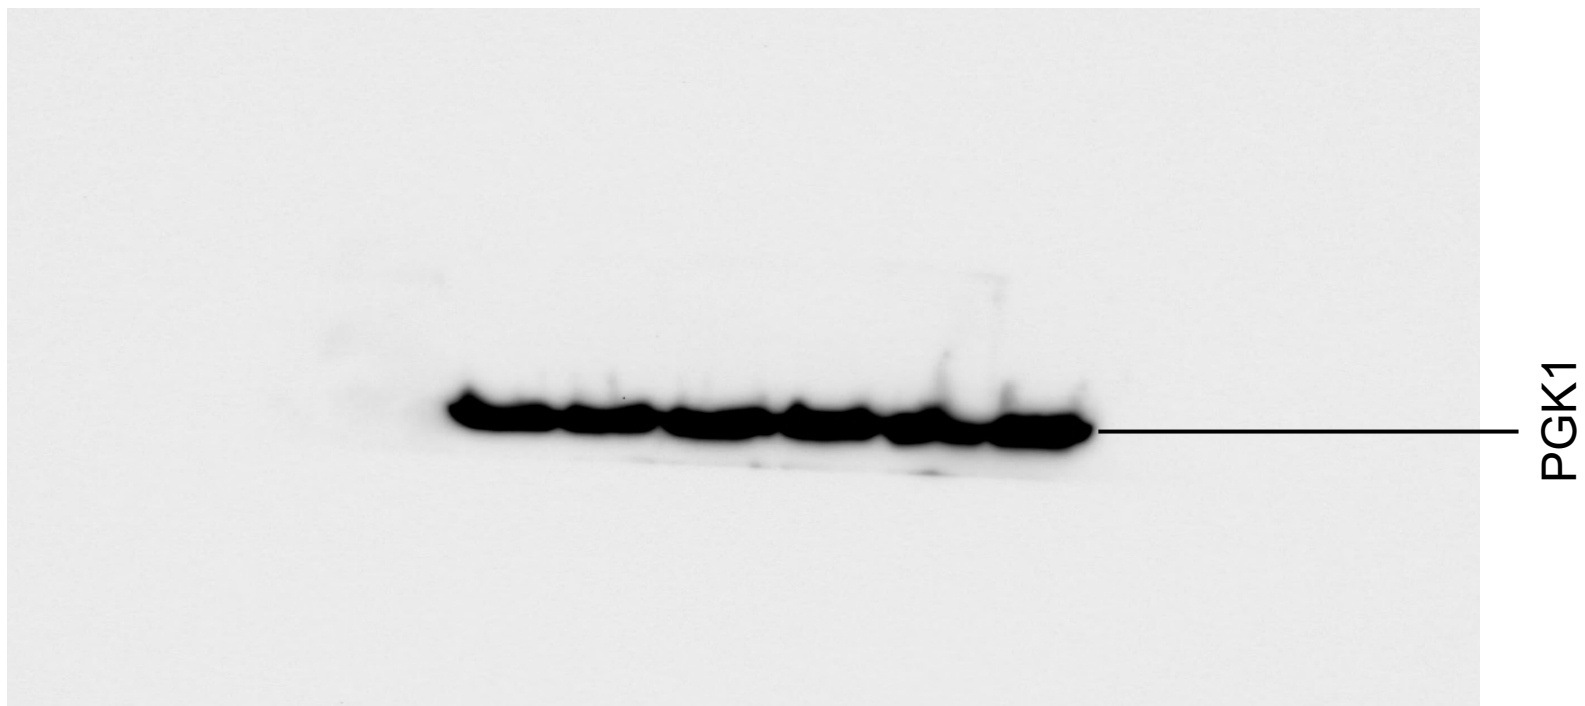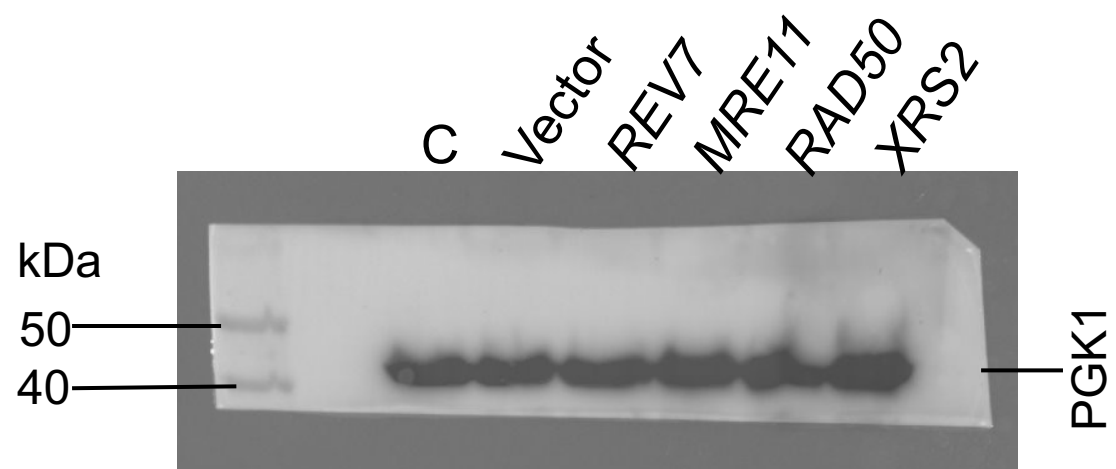

Supplement: fig2-figsupp2-data2 [file elife-96933-fig2-figsupp2-data2-v1.zip]

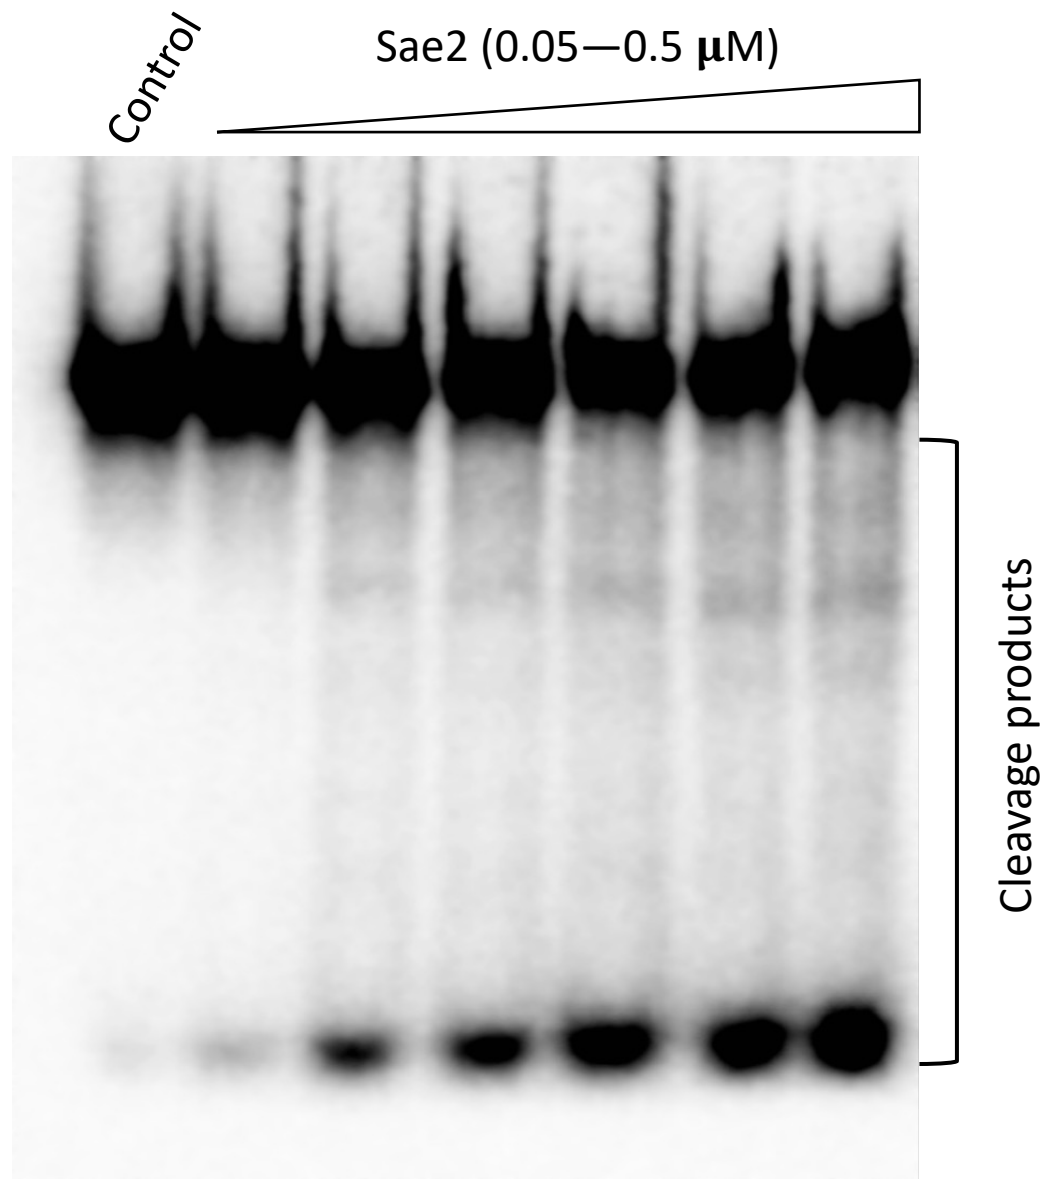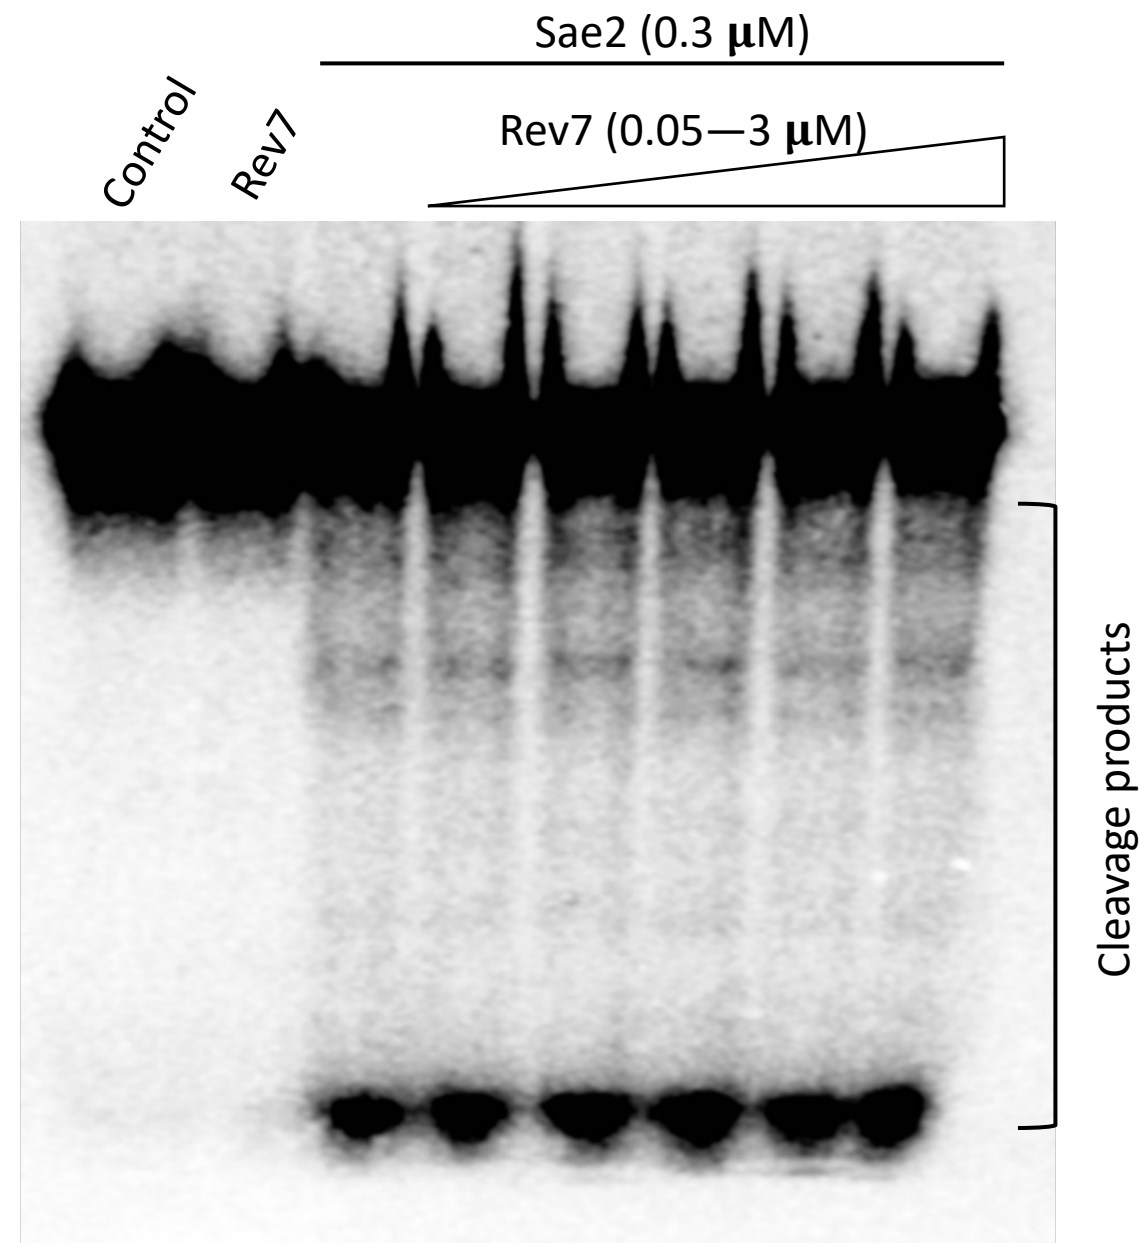

Supplement: fig5-figsupp1-data2 [file elife-96933-fig5-figsupp1-data2-v1.zip]

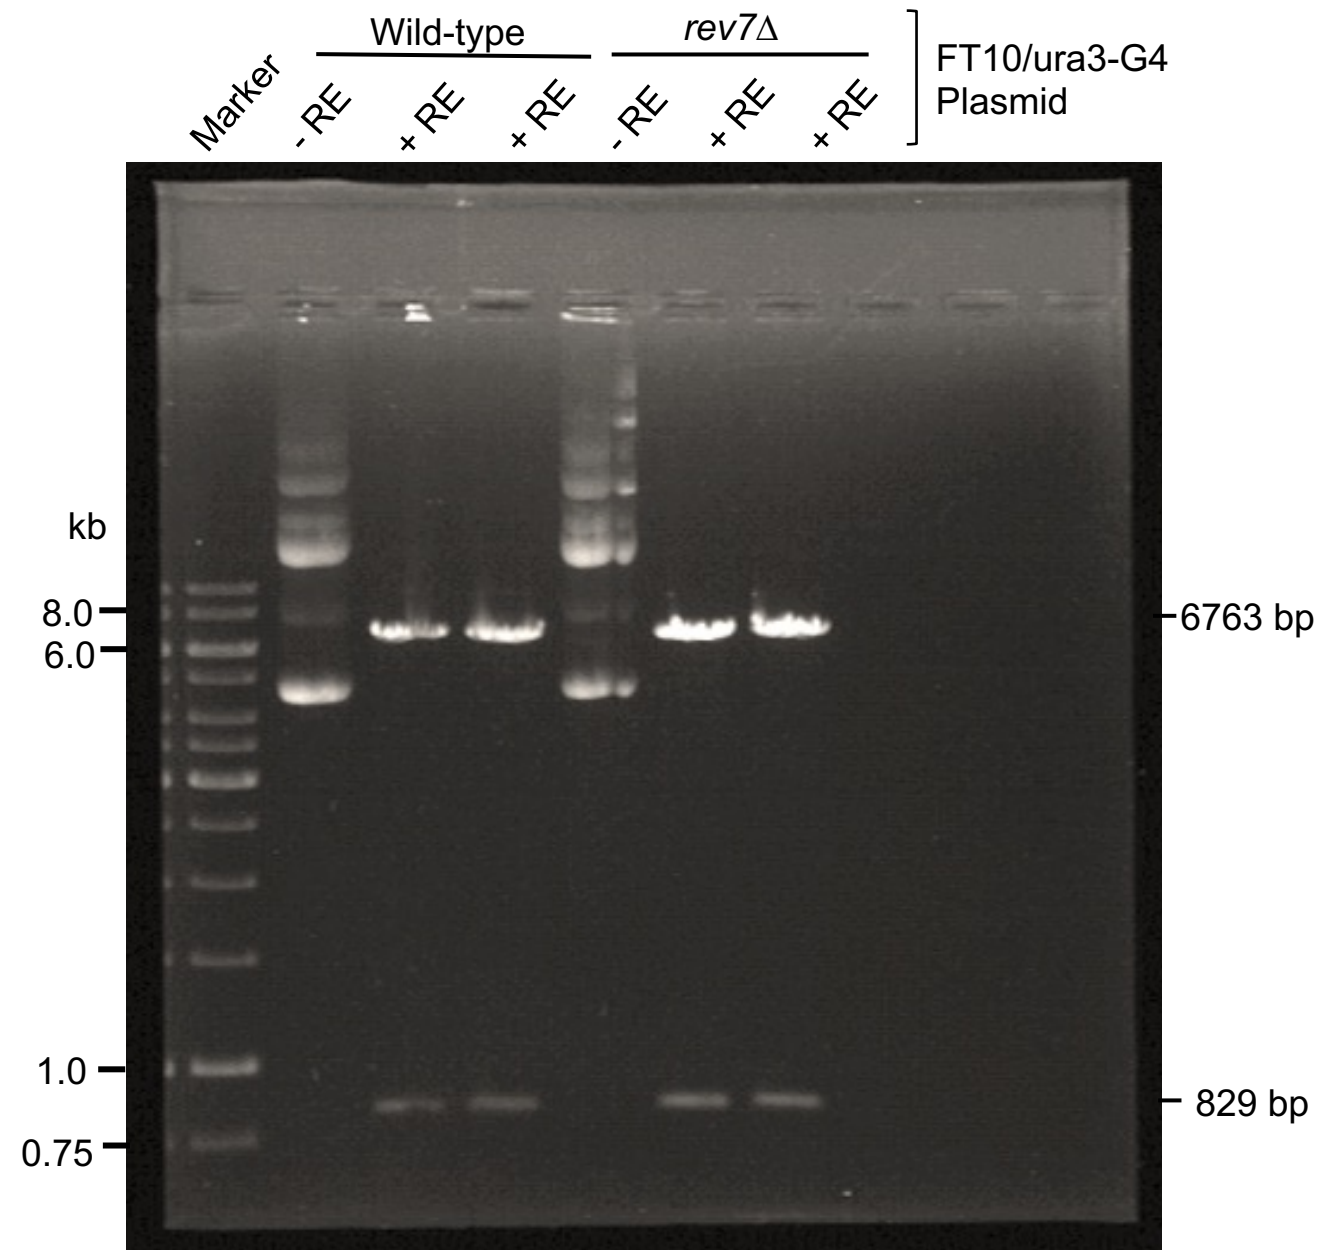

Supplement: fig9-figsupp2-data1 [file elife-96933-fig9-figsupp2-data1-v1.zip]
